# Supplementary Figure 1

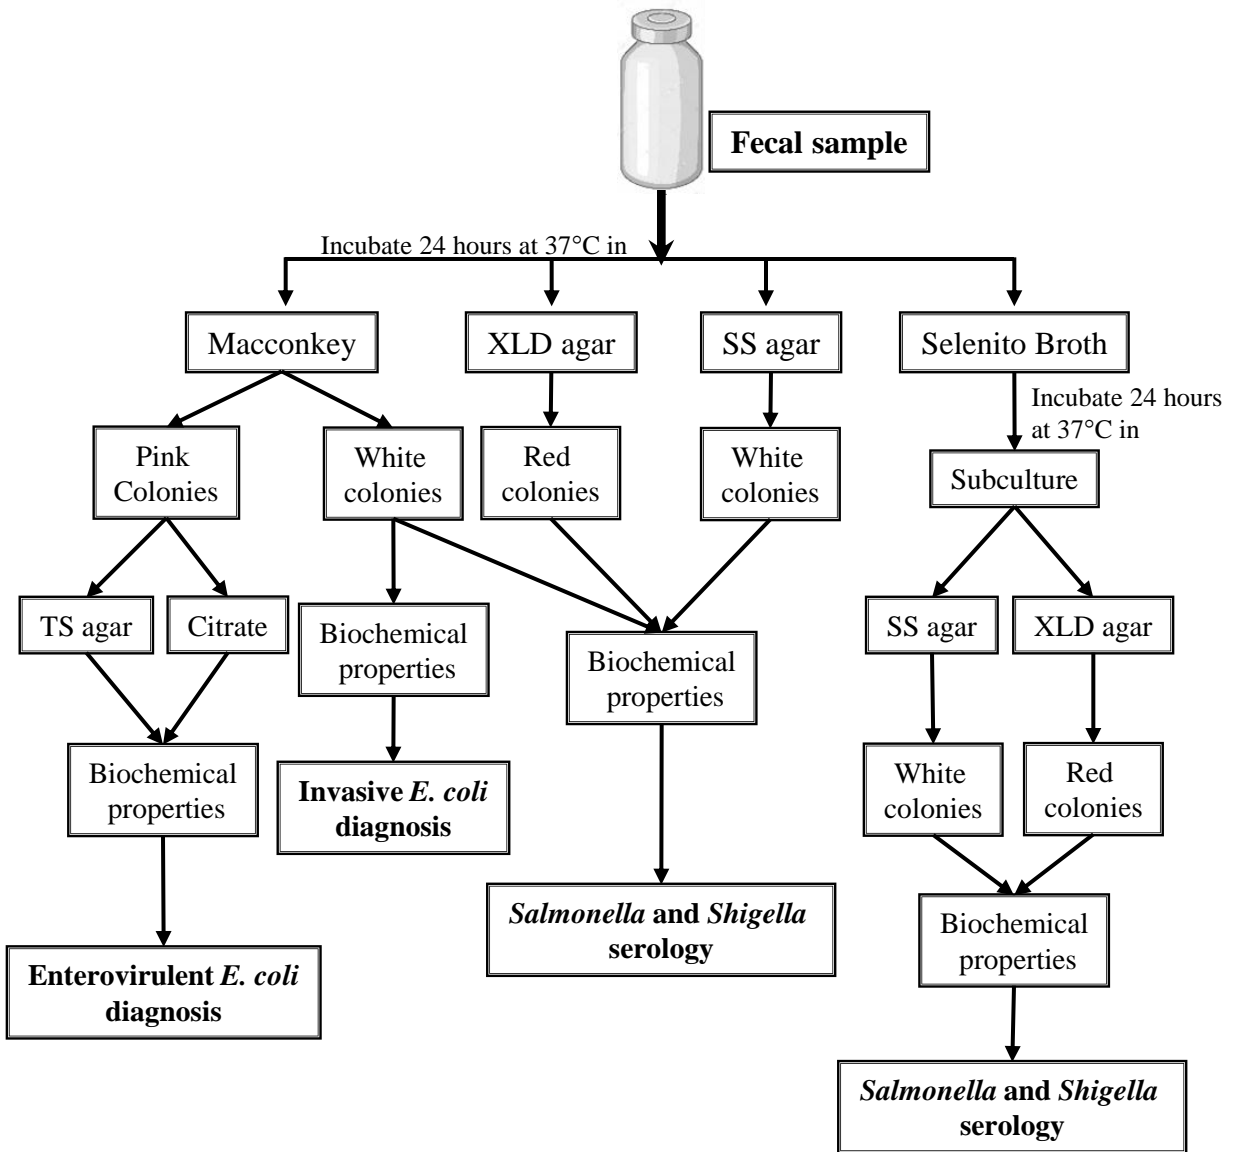

Source: https://storage.googleapis.com/plos-corpus-prod/10.1371/journal.pone.0240404/1/pone.0240404.s001.pdf
